# Supplementary material
Source: PubMed Central journal article supplement (PMC7914224)
Supplement: NIHMS1648782-supplement-2.pdf [file NIHMS1648782-supplement-2.pdf]

# Supplementary Fig. 1

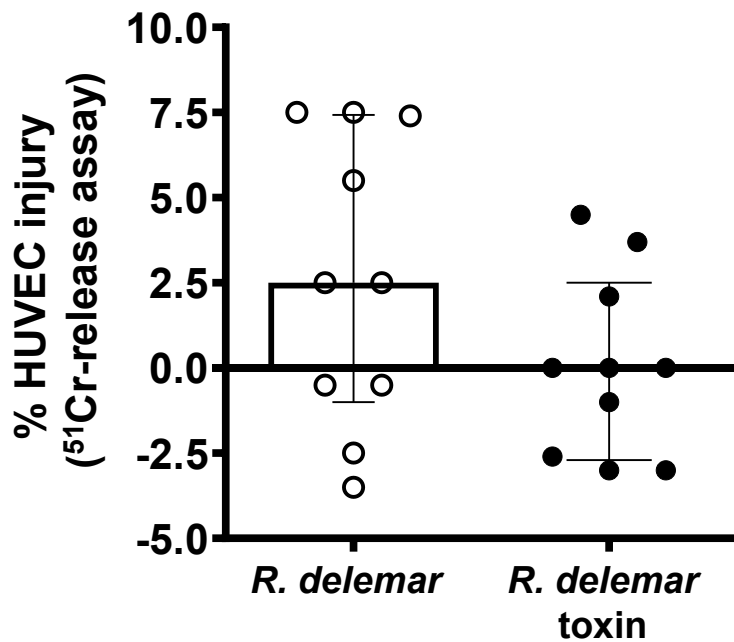

**Supplementary Fig. 1. Incubation of lower inoculum of *R. delemar* or its toxin with HUVECs induces minimal to no host cell injury.** Data are presented as %  $^{51}\text{Cr}$ -released from HUVECs challenged with  $1 \times 10^5$  spores of *R. delemar* or  $50 \mu\text{g/ml}$  of *R. delemar* toxin for 5 hours. Data ( $n=10/\text{group}$ ) are as median  $\pm$  interquartile range from three experiments.

# Supplementary Fig. 2

```

saporin VTSITL DLVNPTAGQYSSFVDKIRNNVKDPNLKYGGTDIAVIGPPSKEKFLRINFQSSRG
Mucorin -----MYFEE-----GRLFFIKSQFNGRVL
                :::                               .. *:. :*:.

saporin TVSLGLKRDNLV VVAYLAMDN TNVNRAYYFRSEITSAESTALFPEATTANQKALEYTEDY
Mucorin DVEDGSTEDDANIIVYTQKYEDCLNQLW-----RYENGY
                * . * . *: ::. * : : * . : * :. *

saporin QSI EKNAQITQGDQSRKELGLGIDLLSTSMEAVNKKARVVKDEARFLLIA IQMTAEAAEF
Mucorin FINAKSAKV-----LDIRGGEMQPESQIIQYAQKMVEEAANQ
                * . * : : : : : : : * : : : * : * . * * * .

saporin RYIQNLV IKNFPNKFNS ENKVIQFEVNWKKI STAIYGD AKNGVFNKDYDFGFGKVRQVKD
Mucorin RWAID-----EDGYIFCEARPDLVLDIQGA EDEDCVPVILYERREGEVSA--N
                * : : * : * * . . : . : : * * : * : * : :

saporin LQMGLLLMYLGKPK
Mucorin QRWELVPFEG---

```

**Supplementary Fig. 2. CLUSTAL multiple sequence alignment by MUSCLE (3.8) between mucorin and saporin from *Saponaria officinalis*.** The predicted Type 1 RIP domain in saporin (shown in yellow) aligned with sequence from mucorin with 10 out of 17 amino acid residues conserved.

**Supplementary Table 2. Ten proteins that are structurally similar to mucoricin.** The 3-D model of mucoricin was used to identify structurally similar proteins in the protein data bank (PDB) by Tm align.

| Rank | PDB Hit | Tm score | RMSD | Identity | Coverage | Protein Description                                                                                          | Classification             | Link                                                                                  |
|------|---------|----------|------|----------|----------|--------------------------------------------------------------------------------------------------------------|----------------------------|---------------------------------------------------------------------------------------|
| 1    | 3ef2D   | 0.947    | 1.05 | 0.166    | 0.986    | <i>Marasmius oreades</i> mushroom lectin (MOA) in complex with Gal-alpha(1,3)[Fuc-alpha(1,2)]Gal and Calcium | Sugar binding protein      | <a href="https://www.rcsb.org/structure/3ef2">https://www.rcsb.org/structure/3ef2</a> |
| 2    | 3vsfA   | 0.871    | 1.28 | 0.248    | 0.912    | 1,3 Gal 43A, an exo-beta-1,3-Galactanase from <i>Clostridium thermocellum</i>                                | Sugar binding protein      | <a href="https://www.rcsb.org/structure/3vsf">https://www.rcsb.org/structure/3vsf</a> |
| 3    | 3pg0A   | 0.862    | 1.13 | 0.295    | 0.898    | 3-fold symmetric protein, Three Foil                                                                         | De novo protein            | <a href="https://www.rcsb.org/structure/3pg0">https://www.rcsb.org/structure/3pg0</a> |
| 4    | 2x2tA   | 0.838    | 1.55 | 0.157    | 0.912    | <i>Sclerotinia sclerotiorum</i> Agglutinin (SSA) in complex with Gal-beta1,3-Galnac                          | Cell adhesion              | <a href="https://www.rcsb.org/structure/2x2t">https://www.rcsb.org/structure/2x2t</a> |
| 5    | 3nbeA   | 0.835    | 1.6  | 0.164    | 0.912    | <i>Clitocybe nebularis</i> ricin B-like lectin (CNL) in complex with N,N'-diacetyllactosediamine             | Sugar binding protein      | <a href="https://www.rcsb.org/structure/3nbe">https://www.rcsb.org/structure/3nbe</a> |
| 6    | 4g9mA   | 0.831    | 1.35 | 0.223    | 0.884    | Crystal structure of the <i>Rhizoctonia solani</i> agglutinin                                                | Sugar binding protein      | <a href="https://www.rcsb.org/structure/4g9m">https://www.rcsb.org/structure/4g9m</a> |
| 7    | 3phzA   | 0.827    | 2.03 | 0.179    | 0.912    | <i>Polyporus squamosus</i> lectin bound to human-type influenza-binding epitope Neu5Aca2-6Galb1-4GlcNAc      | Sugar binding protein      | <a href="https://www.rcsb.org/structure/3phz">https://www.rcsb.org/structure/3phz</a> |
| 8    | 5xg5A   | 0.825    | 1.43 | 0.099    | 0.891    | Crystal structure of Mitsuba-1 with bound NAcGal                                                             | De novo protein            | <a href="https://www.rcsb.org/structure/5xg5">https://www.rcsb.org/structure/5xg5</a> |
| 9    | 2vseA3  | 0.825    | 1.95 | 0.187    | 0.905    | Structure and mode of action of a mosquitocidal holotoxin ( <i>Lysinibacillus sphaericus</i> )               | Toxin                      | <a href="https://www.rcsb.org/structure/2vse">https://www.rcsb.org/structure/2vse</a> |
| 10   | 3a23B   | 0.822    | 1.54 | 0.188    | 0.878    | Crystal Structure of beta-L-Arabinopyranosidase complexed with D-galactose                                   | Hydrolase<br>(glycosidase) | <a href="https://www.rcsb.org/structure/3a23">https://www.rcsb.org/structure/3a23</a> |

Supplementary Table 3: Ricin orthologs in different Mucorales and the presence of vascular leak and RIP motifs

| S. No. | S. No.                                         |                | MUSCLE Sequence Alignment (Percent Identity Matrix) |                          |                            |                                                |                                     |                                                |                       |                      |                     |                   |                                 |                                       |                                       |                |                |                           |                          |                                       | Vascular Leak Motifs |                        |                                   |     |     | Ribosome Inactivation Motifs (Reported in Ricin) |             |                 |             |              |                         |              |                   |         |                         |  |
|--------|------------------------------------------------|----------------|-----------------------------------------------------|--------------------------|----------------------------|------------------------------------------------|-------------------------------------|------------------------------------------------|-----------------------|----------------------|---------------------|-------------------|---------------------------------|---------------------------------------|---------------------------------------|----------------|----------------|---------------------------|--------------------------|---------------------------------------|----------------------|------------------------|-----------------------------------|-----|-----|--------------------------------------------------|-------------|-----------------|-------------|--------------|-------------------------|--------------|-------------------|---------|-------------------------|--|
|        | Organisms                                      |                | 1                                                   | 2                        | 3                          | 4                                              | 5                                   | 6                                              | 7                     | 8                    | 9                   | 10                | 11                              | 12                                    | 13                                    | 14             | 15             | 16                        | 17                       | 18                                    | 19                   | 20                     | [x= L, I, G or V], [y= V, L or S] |     |     |                                                  |             | EAARF Motif     |             | WGRLS Motif  |                         |              |                   |         |                         |  |
|        | Organisms' Name                                | Accession ID   | Ricinus communis                                    | Choanephora cucurbitarum | Rhizopus delenar RA 99-880 | Mucor circinelloides f. circinelloides 1006PHL | Mucor circinelloides f. lusitanicus | Mucor circinelloides f. lusitanicus CBS 277.49 | Rhizopus azzygosporus | Rhizopus microsporus | Rhizopus stolonifer | Rhizopus ambiguus | Rhizopus microsporus ATCC 52813 | Rhizopus microsporus var. microsporus | Phycomyces blakesleeaeus NRRL 1555(-) | Absidia glauca | Absidia repens | Syncephalastrum racemosum | Hesseltinella vesiculosa | Lichtheimia corymbifera JMRC:FSU:9682 | Lichtheimia ramosa   | Parasitella parasitica | LDV                               | IDV | IDS | GDL                                              | VDV         | Score           | p-value     | Q-value      | Motif in Target Protein | Score        | p-value           | Q-value | Motif in Target Protein |  |
| 1      | Ricinus communis                               | NP_001310630.1 | 100                                                 | 30                       | 30                         | 29                                             | 27                                  | 27                                             | 27                    | 27                   | 27                  | 26                | 26                              | 26                                    | 24                                    | 23             | 21             | 21                        | 20                       | 17                                    | 16                   | Yes                    |                                   |     |     |                                                  | Yes         | 19.81           | <0.00001    | 0.003        | EAARF                   | 20.92 / 4.28 | <0.00001 / 0.0009 | 0.001/1 | WGRLS /RGRLT            |  |
| 2      | Choanephora cucurbitarum                       | OB289643.1     | 30                                                  | 100                      | 81                         | 78                                             | 76                                  | 76                                             | 85                    | 75                   | 75                  | 74                | 74                              | 80                                    | 45                                    | 45             | 46             | 45                        | 47                       | 43                                    | 73                   | Yes                    |                                   |     |     |                                                  |             | 4.25            | 0.0019      | 0.59         | EAANQ                   |              |                   |         |                         |  |
| 3      | Rhizopus delenar RA 99-880                     | EI181863.1     | 30                                                  | 81                       | 100                        | 78                                             | 72                                  | 72                                             | 87                    | 77                   | 77                  | 72                | 77                              | 77                                    | 45                                    | 48             | 44             | 44                        | 48                       | 44                                    | 71                   | Yes                    |                                   |     |     |                                                  |             | 4.25            | 0.0019      | 0.59         | EAANQ                   | 4.28         | 0.0009            | 1       | EGRLF                   |  |
| 4      | Mucor circinelloides f. circinelloides 1006PHL | EPB83885.1     | 29                                                  | 78                       | 78                         | 100                                            | 90                                  | 90                                             | 78                    | 69                   | 69                  | 90                | 69                              | 69                                    | 73                                    | 43             | 45             | 44                        | 41                       | 45                                    | 42                   | 82                     | Yes                               |     |     |                                                  |             | 4.25            | 0.0019      | 0.59         | EAANQ                   |              |                   |         |                         |  |
| 5      | Mucor circinelloides f. lusitanicus            | KAF1807713.1   | 27                                                  | 76                       | 72                         | 90                                             | 100                                 | 100                                            | 73                    | 66                   | 66                  | 97                | 68                              | 68                                    | 73                                    | 40             | 43             | 40                        | 40                       | 42                                    | 40                   | 78                     | Yes                               |     |     |                                                  |             | 4.25            | 0.0019      | 0.59         | EAANQ                   |              |                   |         |                         |  |
| 6      | Mucor circinelloides f. lusitanicus CBS 277.49 | OADD1005.1     | 27                                                  | 76                       | 72                         | 90                                             | 100                                 | 100                                            | 73                    | 66                   | 66                  | 97                | 68                              | 68                                    | 73                                    | 40             | 43             | 40                        | 40                       | 42                                    | 40                   | 78                     | Yes                               |     |     |                                                  |             | 4.25            | 0.0019      | 0.59         | EAANQ                   |              |                   |         |                         |  |
| 7      | Rhizopus azzygosporus                          | RCH82711.1     | 27                                                  | 85                       | 87                         | 78                                             | 73                                  | 73                                             | 100                   | 77                   | 77                  | 73                | 77                              | 77                                    | 76                                    | 45             | 46             | 41                        | 43                       | 48                                    | 45                   | 68                     | Yes                               |     |     |                                                  |             | 4.25            | 0.0019      | 0.59         | EAANQ                   |              |                   |         |                         |  |
| 8      | Rhizopus microsporus                           | ORE22231.1     | 27                                                  | 75                       | 77                         | 69                                             | 66                                  | 66                                             | 77                    | 100                  | 100                 | 66                | 99                              | 99                                    | 69                                    | 46             | 45             | 46                        | 42                       | 45                                    | 42                   | 66                     | Yes                               |     |     |                                                  |             |                 |             |              |                         |              |                   |         |                         |  |
| 9      | Rhizopus stolonifer                            | RCH89556.1     | 27                                                  | 75                       | 77                         | 69                                             | 66                                  | 66                                             | 77                    | 100                  | 100                 | 66                | 99                              | 99                                    | 69                                    | 46             | 45             | 46                        | 42                       | 45                                    | 42                   | 66                     | Yes                               |     |     |                                                  |             |                 |             |              |                         |              |                   |         |                         |  |
| 10     | Mucor ambiguus                                 | GAND6585.1     | 27                                                  | 75                       | 72                         | 90                                             | 97                                  | 97                                             | 73                    | 66                   | 66                  | 100               | 67                              | 67                                    | 71                                    | 40             | 43             | 40                        | 40                       | 42                                    | 39                   | 77                     | Yes                               |     |     |                                                  |             | 4.25            | 0.0019      | 0.59         | EAANQ                   |              |                   |         |                         |  |
| 11     | Rhizopus microsporus ATCC 52813                | XP_023462404.1 | 26                                                  | 74                       | 77                         | 69                                             | 68                                  | 68                                             | 77                    | 99                   | 99                  | 67                | 100                             | 100                                   | 69                                    | 44             | 45             | 45                        | 41                       | 44                                    | 42                   | 67                     | Yes                               |     |     |                                                  |             |                 |             |              |                         |              |                   |         |                         |  |
| 12     | Rhizopus microsporus var. microsporus          | ORE05386.1     | 26                                                  | 74                       | 77                         | 69                                             | 68                                  | 68                                             | 77                    | 99                   | 99                  | 67                | 100                             | 100                                   | 69                                    | 44             | 45             | 45                        | 41                       | 44                                    | 42                   | 67                     | Yes                               |     |     |                                                  |             |                 |             |              |                         |              |                   |         |                         |  |
| 13     | Phycomyces blakesleeaeus NRRL 1555(-)          | XP_018295414.1 | 26                                                  | 80                       | 77                         | 73                                             | 73                                  | 73                                             | 76                    | 69                   | 69                  | 71                | 69                              | 69                                    | 100                                   | 38             | 41             | 42                        | 39                       | 42                                    | 36                   | 68                     |                                   | Yes |     |                                                  |             | 4.25            | 0.0019      | 0.59         | EAANQ                   |              |                   |         |                         |  |
| 14     | Absidia glauca                                 | SAL96273.1     | 24                                                  | 45                       | 45                         | 43                                             | 40                                  | 40                                             | 45                    | 46                   | 46                  | 40                | 44                              | 44                                    | 38                                    | 100            | 69             | 47                        | 41                       | 42                                    | 44                   | 40                     | Yes                               |     |     |                                                  |             |                 |             |              |                         |              |                   |         |                         |  |
| 15     | Absidia repens                                 | ORZ12009.1     | 23                                                  | 45                       | 48                         | 45                                             | 43                                  | 43                                             | 46                    | 45                   | 45                  | 43                | 45                              | 45                                    | 41                                    | 69             | 100            | 43                        | 38                       | 39                                    | 44                   | 41                     | Yes                               |     |     | Yes                                              |             |                 |             |              |                         |              |                   |         |                         |  |
| 16     | Syncephalastrum racemosum                      | ORY99019.1     | 21                                                  | 46                       | 44                         | 44                                             | 40                                  | 40                                             | 41                    | 46                   | 46                  | 40                | 45                              | 45                                    | 42                                    | 47             | 43             | 100                       | 44                       | 46                                    | 44                   | 41                     | Yes                               | Yes |     |                                                  |             |                 |             |              |                         |              |                   |         |                         |  |
| 17     | Hesseltinella vesiculosa                       | ORX62783.1     | 21                                                  | 45                       | 44                         | 41                                             | 40                                  | 40                                             | 43                    | 42                   | 42                  | 40                | 41                              | 41                                    | 39                                    | 41             | 38             | 44                        | 100                      | 56                                    | 51                   | 36                     | Yes                               |     |     | Yes                                              |             |                 |             |              |                         |              |                   |         |                         |  |
| 18     | Lichtheimia corymbifera JMRC:FSU:9682          | CDH57241.1     | 20                                                  | 47                       | 48                         | 45                                             | 42                                  | 42                                             | 48                    | 45                   | 45                  | 42                | 44                              | 44                                    | 42                                    | 42             | 39             | 46                        | 56                       | 100                                   | 47                   | 42                     | Yes                               | Yes |     |                                                  | 4.88 / 4.74 | 0.0009 / 0.0014 | 0.59 / 0.59 | GAAAF /EATRO |                         |              |                   |         |                         |  |
| 19     | Lichtheimia ramosa                             | CD503748.1     | 17                                                  | 43                       | 44                         | 42                                             | 40                                  | 40                                             | 45                    | 42                   | 42                  | 39                | 42                              | 42                                    | 36                                    | 44             | 44             | 44                        | 51                       | 47                                    | 100                  | 41                     | Yes                               |     | Yes |                                                  |             | 4.88 / 4.74     |             |              |                         |              |                   |         |                         |  |
| 20     | Parasitella parasitica                         | CEP13132.1     | 16                                                  | 73                       | 71                         | 82                                             | 78                                  | 78                                             | 68                    | 66                   | 66                  | 77                | 67                              | 67                                    | 68                                    | 40             | 41             | 41                        | 36                       | 42                                    | 41                   | 100                    | Yes                               |     |     |                                                  |             | 4.25            | 0.0019      | 0.59         | EAANQ                   |              |                   |         |                         |  |

Note:

- Protein sequences were aligned using MUSCLE in CLUSTAL format and % sequence identify matrix was generated.
- Protein sequences were scanned for individual motifs using FIMO (Find Individual Motif Occurrences); Version 5.1.1 tool (<http://meme-suite.org>).
- The p-value (threshold p=0.001) of a motif occurrence is defined as the probability of a random sequence of the same length as the motif matching that position of the sequence with as good or better a score.
- The score (Threshold +0.001) for the match of a position in a sequence to a motif is computed by summing the appropriate entries from each column of the position-dependent scoring matrix that represents the motif.
- The q-value of a motif occurrence is defined as the false discovery rate if the occurrence is accepted as significant.
