# Supplementary material
Source: PubMed Central journal article supplement (PMC7914224)

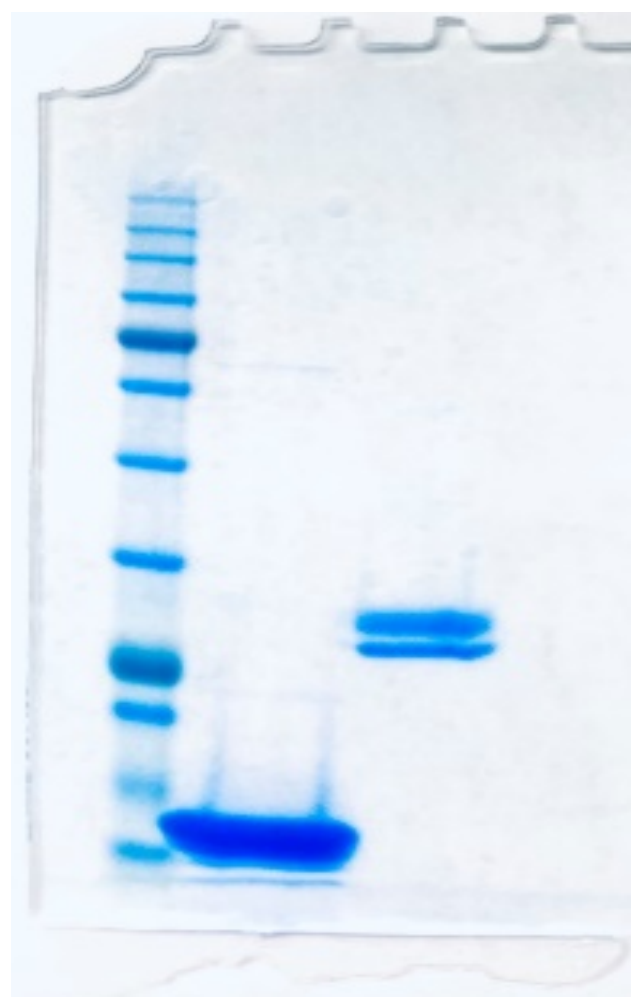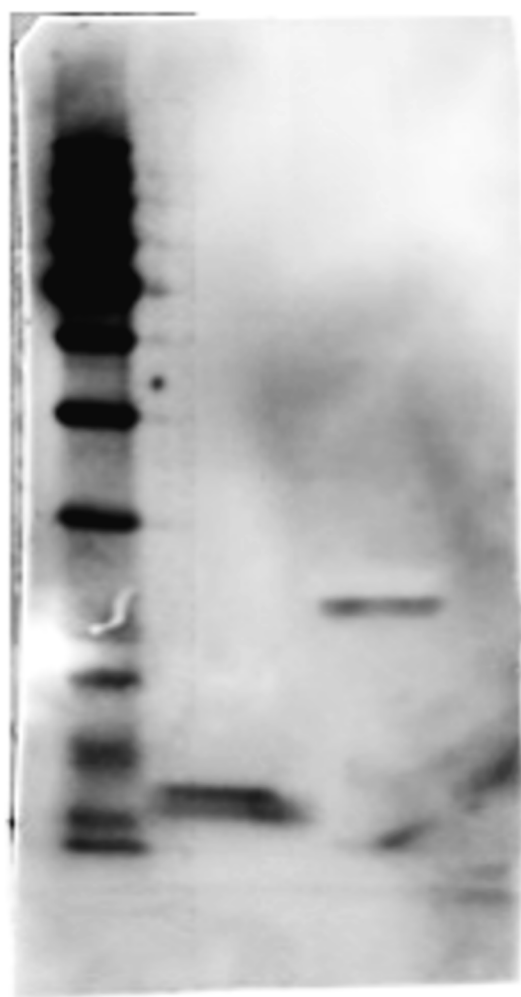

Supplement: NIHMS1648782-supplement-1648782_SourceDataFig3e.pdf [file NIHMS1648782-supplement-1648782_SourceDataFig3e.pdf]

Toxin

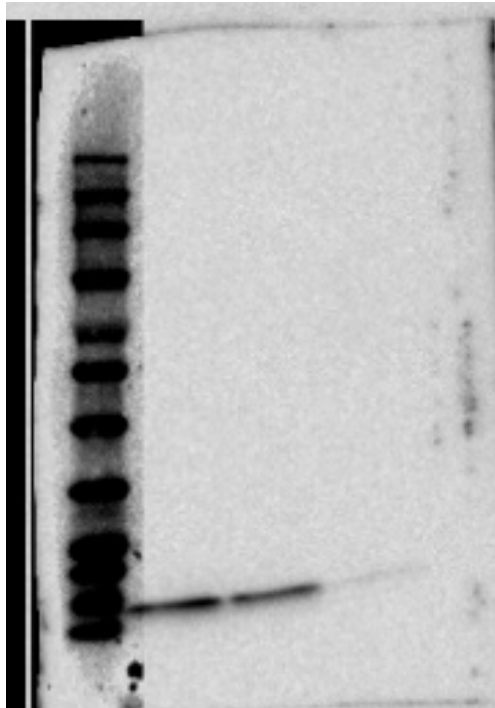

Actin

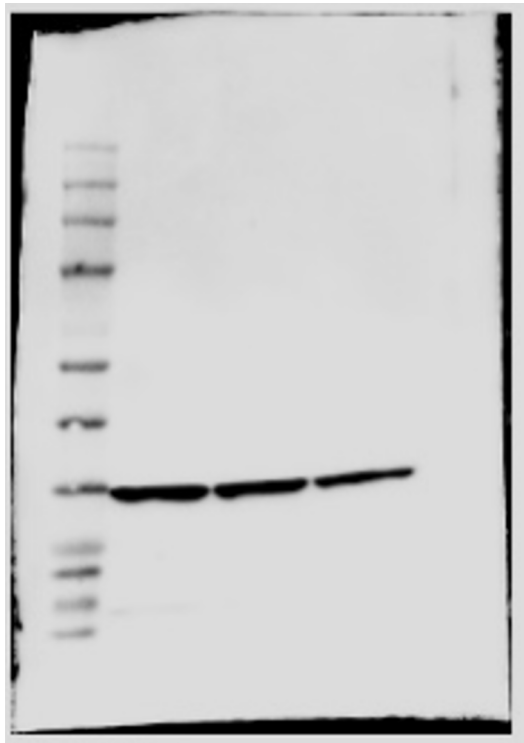

Supplement: NIHMS1648782-supplement-1648782_SourceExtDataFig5b.pdf [file NIHMS1648782-supplement-1648782_SourceExtDataFig5b.pdf]
